# Supplementary material for: Vacancy impacts on electronic and mechanical properties of MX2 (M = Mo, W and X = S, Se) monolayers
Source: Royal Society of Chemistry journal article supplement (doi:10.1039/d3ra00205e), 2023-01-01
Supplement: d3ra00205e1.pdf [file d3ra00205e1.pdf]

# Supplementary Information

## Vacancy Impacts on electronic and mechanical properties of $\text{MX}_2$ (M = Mo, W and X = S, Se) monolayers

*Seyedeh Alieh Kazemi<sup>1</sup>; Sadegh Imani Yengejeh<sup>1</sup>; Samuel Akinlolu Ogunkunle<sup>1</sup>; Lei Zhang<sup>1</sup>;*

*William Wen<sup>1</sup>; Alan Wee-Chung Liew<sup>2</sup>; Yun Wang<sup>1,\*</sup>*

1. Centre for Catalysis and Clean Energy, School of Environment and Science, Griffith University, Gold Coast Campus, QLD 4222, Australia
2. School of Information and Communication Technology, Griffith University, Gold Coast, Queensland 4215, Australia

\* Corresponding author email: [yun.wang@griffith.edu.au](mailto:yun.wang@griffith.edu.au)

Lattice vectors and the corresponding cartesian coordinate of  $\text{MX}_2$  (M represents a transition metal atoms Molybdenum (Mo) or Tungsten (W), and X represents a chalcogen atom, e.g., Sulphur (S) or Selenium (Se)) with different point vacancy defects:

## MoS<sub>2</sub>

### S Vacancy

#### Lattice Vectors

|                     |                     |                     |
|---------------------|---------------------|---------------------|
| 9.4111732387357581  | -0.0000000000040924 | 0.0000000000000000  |
| -4.7055866192227152 | 8.1503151041249655  | 0.0000000000000000  |
| 0.0000000000000000  | 0.0000000000000000  | 20.0000000000000000 |

#### Cartesian Coordinate

|                     |                    |                    |     |
|---------------------|--------------------|--------------------|-----|
| 0.0215220167281329  | 1.8236069506406347 | 2.4970840362428239 | Mo1 |
| -1.5685288730419453 | 4.5286186393060612 | 2.5306437196032041 | Mo2 |
| -3.1364812075237172 | 7.2443917465463477 | 2.5306437196032041 | Mo3 |
| 3.1370577462783928  | 1.8594130950773646 | 2.4638594604674320 | Mo4 |
| 1.6102989122457840  | 4.5038369665962072 | 2.4638594604674320 | Mo5 |
| -0.0005765384633660 | 7.2443917465449843 | 2.5306437196032041 | Mo6 |
| 6.2525934758273092  | 1.8236069506379251 | 2.4970840362428239 | Mo7 |
| 4.6638165804051335  | 4.5038369665948794 | 2.4638594604674320 | Mo8 |
| 3.1370577463738334  | 7.2198731269898326 | 2.4970840362428239 | Mo9 |
| 1.6001919929660162  | 0.9704986262481915 | 4.0744399626004215 | S1  |
| 0.0720435488763544  | 3.6173293729886216 | 4.0744399626004215 | S2  |
| -1.5685289906493578 | 6.3391339472342754 | 4.1132287304178297 | S3  |
| 4.6739232642797202  | 0.9704986262468549 | 4.0744399626004215 | S4  |
| 1.6089091845806180  | 6.2792587383396787 | 4.0744399626004215 | S5  |
| 7.8426442479895924  | 0.9055905444815892 | 4.0596985465995781 | S6  |
| 6.2020717084636665  | 3.6173293729859561 | 4.0744399626004215 | S7  |
| 4.6652060728542262  | 6.2792587383383500 | 4.0744399626004215 | S8  |
| 1.5912787854617365  | 0.8969430950584872 | 0.9256009901253039 | S9  |
| 0.0038859865259409  | 3.6463880744567678 | 0.9256009901253039 | S10 |
| -1.5685289906493578 | 6.3391339472342754 | 0.9689671040588620 | S11 |
| 4.6828364717813793  | 0.8969430950571429 | 0.9256009901253039 | S12 |
| 3.1370576286700667  | 3.6223622458579610 | 0.8797783937917820 | S13 |
| 1.5496648297334481  | 6.3237555680612960 | 0.9256009901253039 | S14 |
| 7.8426442479895924  | 0.9055905444815892 | 0.9366893825510659 | S15 |
| 6.2702292708151166  | 3.6463880744540429 | 0.9256009901253039 | S16 |
| 4.7244504277029806  | 6.3237555680599149 | 0.9256009901253039 | S17 |

### 2S Vacancy

#### Lattice Vectors

|                     |                     |                     |
|---------------------|---------------------|---------------------|
| 9.3153270716903354  | -0.0000000000057800 | 0.0000000000000000  |
| -4.6576635357029819 | 8.0673098886103141  | 0.0000000000000000  |
| 0.0000000000000000  | 0.0000000000000000  | 20.0000000000000000 |

#### Cartesian Coordinate

|                     |                    |                    |     |
|---------------------|--------------------|--------------------|-----|
| 0.0202885694591086  | 1.8044492153240670 | 2.4617752022867019 | Mo1 |
| -1.5525545118684363 | 4.5369699026789050 | 2.5775729523761020 | Mo2 |
| -3.0573641753539080 | 7.1433766956248128 | 2.5775729523761020 | Mo3 |
| 3.1051090239287853  | 1.8166203503318090 | 2.4647365043725240 | Mo4 |
| 1.5732393088520866  | 4.4698965274903877 | 2.4647365043725240 | Mo5 |
| -0.0477448482910221 | 7.1433766956229450 | 2.5775729523761020 | Mo6 |
| 6.1899294783980325  | 1.8044492153202389 | 2.4617752022867019 | Mo7 |
| 4.6369787390989448  | 4.4698965274884870 | 2.4647365043725240 | Mo8 |
| 3.1051090240227426  | 7.1475149746662634 | 2.4617752022867019 | Mo9 |

|                     |                    |                    |     |
|---------------------|--------------------|--------------------|-----|
| 1.5643211510696766  | 0.9476288129229042 | 4.0841495073749465 | S1  |
| 0.0502766501811220  | 3.5700308134510088 | 4.0841495073749465 | S2  |
| -1.5525546282793603 | 6.2745743353975199 | 4.1832329121015741 | S3  |
| 4.6458966638740993  | 0.9476288129209921 | 4.0841495073749465 | S4  |
| 1.5910644066303687  | 6.2387534912063991 | 4.0841495073749465 | S5  |
| 7.7627724433161527  | 0.8963677429868090 | 4.0177063228830443 | S6  |
| 6.1599411648550939  | 3.5700308134472176 | 4.0841495073749465 | S7  |
| 4.6191534084999182  | 6.2387534912045206 | 4.0841495073749465 | S8  |
| 1.6164002707728709  | 0.8182842160326876 | 0.9195931800152840 | S9  |
| -0.0356994967138822 | 3.6798049525676175 | 0.9195931800152840 | S10 |
| 4.5938175441662787  | 0.8182842160308402 | 0.9195931800152840 | S11 |
| 3.1051089075183467  | 3.5854710391921927 | 0.8841625736687320 | S12 |
| 1.4530091400282350  | 6.2583239489801139 | 0.9195931800152840 | S13 |
| 7.7627724433161527  | 0.8963677429868090 | 0.8801890498989461 | S14 |
| 6.2459173117539661  | 3.6798049525637202 | 0.9195931800152840 | S15 |
| 4.7572086751026754  | 6.2583239489780631 | 0.9195931800152840 | S16 |

## 2Ss Vacancy

### Lattice Vectors

|                     |                     |                     |
|---------------------|---------------------|---------------------|
| 9.3117059180975463  | -0.0000000000059918 | 0.0000000000000000  |
| -4.6558529589068254 | 8.0641738776081713  | 0.0000000000000000  |
| 0.0000000000000000  | 0.0000000000000000  | 20.0000000000000000 |

### Cartesian Coordinate

|                     |                    |                    |     |
|---------------------|--------------------|--------------------|-----|
| 0.0286195435519880  | 1.8085622140967530 | 2.5000000000000000 | Mo1 |
| -1.5519509862706384 | 4.4859038497842230 | 2.5000000000000000 | Mo2 |
| -3.0988728092124260 | 7.1652510425267879 | 2.5000000000000000 | Mo3 |
| 3.1039019727335395  | 1.9495119841354340 | 2.5000000000000000 | Mo4 |
| 1.6883268397005033  | 4.4013600365440597 | 2.5000000000000000 | Mo5 |
| -0.0050291632344663 | 7.1652510425247948 | 2.5000000000000000 | Mo6 |
| 6.1791844019100353  | 1.8085622140927808 | 2.5000000000000000 | Mo7 |
| 4.5194771058527667  | 4.4013600365422061 | 2.5000000000000000 | Mo8 |
| 3.1039019728247563  | 7.1351076290321087 | 2.5000000000000000 | Mo9 |
| 1.6105271796682255  | 0.9645631302668081 | 4.0759138736264564 | S1  |
| 0.0886487391102793  | 3.6005339123260445 | 4.0759138736264537 | S2  |
| -1.5519511026354826 | 6.2721352157378503 | 4.0805337971141560 | S3  |
| 4.5972765329714544  | 0.9645631302648725 | 4.0759138736264537 | S4  |
| 1.5820234158074125  | 6.1871347270104904 | 4.0759138736264564 | S5  |
| 7.7597548153673994  | 0.8960192973284270 | 4.0707216820823460 | S6  |
| 6.1191549736221891  | 3.6005339123221440 | 4.0759138736264564 | S7  |
| 4.6257802970160942  | 6.1871347270085284 | 4.0759138736264537 | S8  |
| 1.6105271796682255  | 0.9645631302668081 | 0.9240862463735540 | S9  |
| 0.0886487391102793  | 3.6005339123260445 | 0.9240862463735540 | S10 |
| -1.5519511026354826 | 6.2721352157378503 | 0.9194663228858541 | S11 |
| 4.5972765329714544  | 0.9645631302648725 | 0.9240862463735540 | S12 |
| 1.5820234158074125  | 6.1871347270104904 | 0.9240862463735540 | S13 |
| 7.7597548153673994  | 0.8960192973284270 | 0.9292784379176640 | S14 |
| 6.1191549736221891  | 3.6005339123221440 | 0.9240862463735540 | S15 |
| 4.6257802970160942  | 6.1871347270085284 | 0.9240862463735540 | S16 |

## Mo Vacancy

### Lattice Vectors

|                     |                     |                     |
|---------------------|---------------------|---------------------|
| 9.5202377734888675  | -0.0000000000021780 | 0.0000000000000000  |
| -4.7601188865958894 | 8.2447677618707615  | 0.0000000000000000  |
| 0.0000000000000000  | 0.0000000000000000  | 20.0000000000000000 |

**Cartesian Coordinate**

|                     |                    |                    |     |
|---------------------|--------------------|--------------------|-----|
| -0.0101326416111291 | 1.8693725632041622 | 2.5000000000000000 | Mo1 |
| -1.5595548480780319 | 4.5530505472514307 | 2.5000000000000000 | Mo2 |
| -3.1734125910309059 | 7.3286825301149658 | 2.5000000000000000 | Mo3 |
| 3.1835452328414684  | 1.8693725632034317 | 2.5000000000000000 | Mo4 |
| 0.0372840891981321  | 7.3188567180178632 | 2.5000000000000000 | Mo5 |
| 6.3468251823588986  | 1.8321706888663589 | 2.5000000000000000 | Mo6 |
| 4.7329674394050052  | 4.5530505472499909 | 2.5000000000000000 | Mo7 |
| 3.1361285022285719  | 7.3188567180171544 | 2.5000000000000000 | Mo8 |
| 1.5867061765953216  | 0.9323505132143106 | 4.0592076640813000 | S1  |
| -0.0345795865066338 | 3.6443767396860336 | 4.0671551459199398 | S2  |
| -1.5726203127466660 | 6.4044645105978573 | 4.0592076640813000 | S3  |
| 4.7632368919755708  | 0.9178855338275690 | 4.0564750955455500 | S4  |
| 3.2079919397949332  | 3.6443767396852915 | 4.0671551459199398 | S5  |
| 1.5867061766947437  | 6.4525260550373140 | 4.0671551459199398 | S6  |
| 7.9304132347033525  | 0.9178855338268443 | 4.0564750955455500 | S7  |
| 6.3468250633888790  | 3.6607407048812854 | 4.0564750955455500 | S8  |
| 4.7460326661344903  | 6.4044645105964113 | 4.0592076640813000 | S9  |
| 1.5867061765953216  | 0.9323505132143106 | 0.9407924559187100 | S10 |
| -0.0345795865066338 | 3.6443767396860336 | 0.9328449740800699 | S11 |
| -1.5726203127466660 | 6.4044645105978573 | 0.9407924559187100 | S12 |
| 4.7632368919755708  | 0.9178855338275690 | 0.9435250244544601 | S13 |
| 3.2079919397949332  | 3.6443767396852915 | 0.9328449740800699 | S14 |
| 1.5867061766947437  | 6.4525260550373140 | 0.9328449740800699 | S15 |
| 7.9304132347033525  | 0.9178855338268443 | 0.9435250244544601 | S16 |
| 6.3468250633888790  | 3.6607407048812854 | 0.9435250244544601 | S17 |
| 4.7460326661344903  | 6.4044645105964113 | 0.9407924559187100 | S18 |

**MoS3 Vacancy**

**Lattice Vectors**

|                     |                     |                     |
|---------------------|---------------------|---------------------|
| 9.4603592762838016  | -0.0000000000034214 | 0.0000000000000000  |
| -4.7301796379953798 | 8.1929114621522015  | 0.0000000000000000  |
| 0.0000000000000000  | 0.0000000000000000  | 20.0000000000000000 |

**Cartesian Coordinate**

|                     |                    |                    |     |
|---------------------|--------------------|--------------------|-----|
| -0.0114642851495199 | 1.7768709459257446 | 2.4168612673825858 | Mo1 |
| -1.6203699208239233 | 4.5635772515713331 | 2.4168612673825858 | Mo2 |
| -3.1534530919643489 | 7.2825880410036392 | 2.5424831387039140 | Mo3 |
| 3.1649173773076975  | 1.7768709459245957 | 2.4168612673825858 | Mo4 |
| -0.0321790895460854 | 7.3144044633605887 | 2.4168612673825858 | Mo5 |
| 6.3069061842217389  | 1.8206470662332435 | 2.4447954852588798 | Mo6 |
| 4.7738230130817074  | 4.5635772515690203 | 2.4168612673825858 | Mo7 |
| 3.1856321819023279  | 7.3144044633594243 | 2.4168612673825858 | Mo8 |
| 1.5767264278118480  | 1.0635150130741815 | 4.0704694338101879 | S1  |
| -1.4440588988704697 | 6.2956686777847306 | 4.0704694338101879 | S2  |
| 4.7373111918935455  | 0.9144409457778009 | 4.0153622900398043 | S3  |
| 7.8765009400085839  | 0.9144409457766074 | 4.0153622900398043 | S4  |
| 6.3069060659997014  | 3.6330590149314852 | 4.0153622900398043 | S5  |
| 4.5975117546813742  | 6.2956686777825457 | 4.0704694338101879 | S6  |

|                     |                    |                    |     |
|---------------------|--------------------|--------------------|-----|
| 1.5767264278081461  | 0.8546734493933973 | 0.9089098369297239 | S7  |
| 0.1555366980254966  | 3.7310931831290590 | 1.2670584157623921 | S8  |
| -1.6249209983830393 | 6.4000894596251587 | 0.9089098369297239 | S9  |
| 4.7069432734445815  | 0.8969080198867991 | 0.8420867500848319 | S10 |
| 2.9979161576935436  | 3.7310931831280310 | 1.2670584157623921 | S11 |
| 1.5767264279035427  | 6.1926660023844269 | 1.2670584157623921 | S12 |
| 7.9068688584568889  | 0.8969080198856418 | 0.8420867500848319 | S13 |
| 6.3069060660002947  | 3.6681248667134518 | 0.8420867500848319 | S14 |
| 4.7783738541976781  | 6.4000894596228433 | 0.9089098369297239 | S15 |

**MoS6 Vacancy**

**Lattice Vectors**

|                     |                     |                     |
|---------------------|---------------------|---------------------|
| 9.0409642721753407  | -0.0000000000106892 | 0.0000000000000000  |
| -4.5204821359540679 | 7.8297047343828554  | 0.0000000000000000  |
| 0.0000000000000000  | 0.0000000000000000  | 20.0000000000000000 |

**Cartesian Coordinate**

|                     |                    |                    |     |
|---------------------|--------------------|--------------------|-----|
| -0.0964879062251843 | 1.8498663886355802 | 2.5000000000000000 | Mo1 |
| -1.4598674860560492 | 4.2113090909657496 | 2.5000000000000000 | Mo2 |
| -3.0136547572730126 | 6.9597376130097528 | 2.5000000000000000 | Mo3 |
| 3.1101426636801159  | 1.8498663886317890 | 2.5000000000000000 | Mo4 |
| 0.1434477989440506  | 6.9883326250415099 | 2.5000000000000000 | Mo5 |
| 6.0273095148132283  | 1.7399344567474080 | 2.5000000000000000 | Mo6 |
| 4.4735222435914750  | 4.2113090909586788 | 2.5000000000000000 | Mo7 |
| 2.8702069586862420  | 6.9883326250382858 | 2.5000000000000000 | Mo8 |
| 1.5068272657023301  | 1.0808869368014453 | 4.0628856988341520 | S1  |
| -1.3241656162240014 | 5.9843104442907764 | 4.0628856988341520 | S2  |
| 4.5005518482344016  | 0.8584604791361425 | 4.1344913545268023 | S3  |
| 7.5540669553378788  | 0.8584604791325324 | 4.1344913545268023 | S4  |
| 6.0273094018312641  | 3.5028821327140856 | 4.1344913545268023 | S5  |
| 4.3378201477959042  | 5.9843104442840263 | 4.0628856988341520 | S6  |
| 1.5068272657023301  | 1.0808869368014453 | 0.9371144211658580 | S7  |
| -1.3241656162240014 | 5.9843104442907764 | 0.9371144211658580 | S8  |
| 4.5005518482344016  | 0.8584604791361425 | 0.8655087654732080 | S9  |
| 7.5540669553378788  | 0.8584604791325324 | 0.8655087654732080 | S10 |
| 6.0273094018312641  | 3.5028821327140856 | 0.8655087654732080 | S11 |
| 4.3378201477959042  | 5.9843104442840263 | 0.9371144211658580 | S12 |

## MoSe<sub>2</sub>

### Se Vacancy

#### Lattice Vectors

|                     |                    |                     |
|---------------------|--------------------|---------------------|
| 9.7777041247952035  | 0.0000000000017589 | 0.0000000000000000  |
| -4.8888520622415781 | 8.4677401627168063 | 0.0000000000000000  |
| 0.0000000000000000  | 0.0000000000000000 | 20.0000000000000000 |

#### Cartesian Coordinate

|                     |                    |                    |      |
|---------------------|--------------------|--------------------|------|
| 0.0275129288034457  | 1.8976047101406495 | 2.5046763361216060 | Mo1  |
| -1.6296173540458823 | 4.7033794201618164 | 2.5387511680938242 | Mo2  |
| -3.2600320987540998 | 7.5273405954814301 | 2.5387511680938242 | Mo3  |
| 3.2592347083013662  | 1.9631209837086792 | 2.4590778750231839 | Mo4  |
| 1.7001125758737556  | 4.6635997323505487 | 2.4590778750231839 | Mo5  |
| 0.0007973907664720  | 7.5273405954820163 | 2.5387511680938242 | Mo6  |
| 6.4909564877965611  | 1.8976047101417519 | 2.5046763361216060 | Mo7  |
| 4.8183568408281463  | 4.6635997323509892 | 2.4590778750231839 | Mo8  |
| 3.2592347084031239  | 7.4951110281278162 | 2.5046763361216060 | Mo9  |
| 1.6733104422512044  | 1.0168474407462100 | 4.1929768650254582 | Se1  |
| 0.0876535417762150  | 3.7632857558145449 | 4.1929768650254582 | Se2  |
| -1.6296174762324536 | 6.5860201030363807 | 4.2345584650107080 | Se3  |
| 4.8451587298738605  | 1.0168474407467807 | 4.1929768650254582 | Se4  |
| 1.6735776856381563  | 6.5101869498323204 | 4.1929768650254582 | Se5  |
| 8.1480866484587011  | 0.9408599945597027 | 4.1765090526304496 | Se6  |
| 6.4308156304499562  | 3.7632857558156254 | 4.1929768650254582 | Se7  |
| 4.8448914866892405  | 6.5101869498328311 | 4.1929768650254582 | Se8  |
| 1.6539645406134653  | 0.9343744938316610 | 0.8215252051438420 | Se9  |
| 0.0065569238052330  | 3.7877681869958066 | 0.8215252051438420 | Se10 |
| -1.6296174762324536 | 6.5860201030363807 | 0.8652566425911340 | Se11 |
| 4.8645046315084919  | 0.9343744938322386 | 0.8215252051438420 | Se12 |
| 3.2592345861130707  | 3.7634400487980719 | 0.7248353601465860 | Se13 |
| 1.6118269693039773  | 6.5681774655655190 | 0.8215252051438420 | Se14 |
| 8.1480866484587011  | 0.9408599945597027 | 0.8376814436019241 | Se15 |
| 6.5119122484218757  | 3.7877681869969773 | 0.8215252051438420 | Se16 |
| 4.9066422030255934  | 6.5681774655661114 | 0.8215252051438420 | Se17 |

### 2Se Vacancy

#### Lattice Vectors

|                     |                     |                     |
|---------------------|---------------------|---------------------|
| 9.6312591405524426  | -0.0000000000010161 | 0.0000000000000000  |
| -4.8156295701249148 | 8.3409150861090851  | 0.0000000000000000  |
| 0.0000000000000000  | 0.0000000000000000  | 20.0000000000000000 |

#### Cartesian Coordinate

|                     |                    |                    |     |
|---------------------|--------------------|--------------------|-----|
| 0.0249774621457253  | 1.8679575062707414 | 2.4568105672175018 | Mo1 |
| -1.6052098566729394 | 4.7248275704500591 | 2.5915289173255478 | Mo2 |
| -3.1316237165634679 | 7.3686539292279178 | 2.5915289173255478 | Mo3 |
| 3.2104197135520867  | 1.9063515316897588 | 2.4545582040995839 | Mo4 |
| 1.6509487892650530  | 4.6074344055530796 | 2.4545582040995839 | Mo5 |
| -0.0787959966866971 | 7.3686539292274773 | 2.5915289173255478 | Mo6 |
| 6.3958619649570529  | 1.8679575062700693 | 2.4568105672175018 | Mo7 |
| 4.7698906379370127  | 4.6074344055526915 | 2.4545582040995839 | Mo8 |
| 3.2104197136514410  | 7.3853053302546012 | 2.4568105672175018 | Mo9 |
| 1.6265883722948780  | 0.9872219078977691 | 4.1963963255946615 | Se1 |

|                     |                    |                    |      |
|---------------------|--------------------|--------------------|------|
| 0.0630435407328878  | 3.6953609961468277 | 4.1963963255946615 | Se2  |
| -1.6052099770317674 | 6.4873783771376070 | 4.3538666278539040 | Se3  |
| 4.7942508139944486  | 0.9872219078973757 | 4.1963963255946615 | Se4  |
| 1.6468747616323856  | 6.4386371412589050 | 4.1963963255946615 | Se5  |
| 8.0260491634197706  | 0.9267683197308924 | 4.1271066473295539 | Se6  |
| 6.3577956456546580  | 3.6953609961461638 | 4.1963963255946615 | Se7  |
| 4.7739644248546185  | 6.4386371412585746 | 4.1963963255946615 | Se8  |
| 1.6748397758851745  | 0.8327546717019294 | 0.8083190354557240 | Se9  |
| -0.0466033080670241 | 3.8143815555244309 | 0.8083190354557240 | Se10 |
| 4.7459994103984791  | 0.8327546717015462 | 0.8083190354557240 | Se11 |
| 3.2104195931939503  | 3.7070733484342795 | 0.7244811990609880 | Se12 |
| 1.4889765092378240  | 6.4740838180771050 | 0.8083190354557240 | Se13 |
| 8.0260491634197706  | 0.9267683197308924 | 0.7575612535256939 | Se14 |
| 6.4674424944589557  | 3.8143815555237435 | 0.8083190354557240 | Se15 |
| 4.9318626772504990  | 6.4740838180768012 | 0.8083190354557240 | Se16 |

**2Ses Vacancy**

**Lattice Vectors**

|                     |                     |                     |
|---------------------|---------------------|---------------------|
| 9.6565062585701451  | -0.0000000000006961 | 0.0000000000000000  |
| -4.8282531291330901 | 8.3627797316843431  | 0.0000000000000000  |
| 0.0000000000000000  | 0.0000000000000000  | 20.0000000000000000 |

**Cartesian Coordinate**

|                     |                    |                    |      |
|---------------------|--------------------|--------------------|------|
| 0.0276054587199372  | 1.8743335911272641 | 2.5000000000000000 | Mo1  |
| -1.6094177096771003 | 4.6552039492660704 | 2.5000000000000000 | Mo2  |
| -3.2108548798969174 | 7.4289744932898936 | 2.5000000000000000 | Mo3  |
| 3.2188354195617261  | 2.1010921428585694 | 2.5000000000000000 | Mo4  |
| 1.8195991055126770  | 4.5246405306512596 | 2.5000000000000000 | Mo5  |
| -0.0079805393563950 | 7.4289744932896635 | 2.5000000000000000 | Mo6  |
| 6.4100653803950332  | 1.8743335911267449 | 2.5000000000000000 | Mo7  |
| 4.6180717336983843  | 4.5246405306508199 | 2.5000000000000000 | Mo8  |
| 3.2188354196578866  | 7.4017060219065209 | 2.5000000000000000 | Mo9  |
| 1.6797488157096274  | 1.0109324885344613 | 4.1831415767342159 | Se1  |
| 0.1059498745026883  | 3.7368322156754821 | 4.1831415767342159 | Se2  |
| -1.6094178303497810 | 6.5043842125243660 | 4.1998110985097981 | Se3  |
| 4.7579217819612847  | 1.0109324885342394 | 4.1831415767342159 | Se4  |
| 1.6450363576769629  | 6.4026082016786816 | 4.1831415767342159 | Se5  |
| 8.0470884281190092  | 0.9291977247343592 | 4.1887613381167901 | Se6  |
| 6.3317207232672708  | 3.7368322156749736 | 4.1831415767342159 | Se7  |
| 4.7926342401897841  | 6.4026082016784551 | 4.1831415767342159 | Se8  |
| 1.6797488157096274  | 1.0109324885344613 | 0.8168585432657940 | Se9  |
| 0.1059498745026883  | 3.7368322156754821 | 0.8168585432657940 | Se10 |
| -1.6094178303497810 | 6.5043842125243660 | 0.8001890214902120 | Se11 |
| 4.7579217819612847  | 1.0109324885342394 | 0.8168585432657940 | Se12 |
| 1.6450363576769629  | 6.4026082016786816 | 0.8168585432657940 | Se13 |
| 8.0470884281190092  | 0.9291977247343592 | 0.8112387818832180 | Se14 |
| 6.3317207232672708  | 3.7368322156749736 | 0.8168585432657940 | Se15 |
| 4.7926342401897841  | 6.4026082016784551 | 0.8168585432657940 | Se16 |

**Mo Vacancy**

**Lattice Vectors**

|                    |                    |                    |
|--------------------|--------------------|--------------------|
| 9.8830278531224884 | 0.0000000000037801 | 0.0000000000000000 |
|--------------------|--------------------|--------------------|

-4.9415139264018082 8.5589531870671127 0.0000000000000000  
0.0000000000000000 0.0000000000000000 20.0000000000000000

**Cartesian Coordinate**

-0.0414319799453589 1.8537017125598958 2.5000000000000000 Mo1  
-1.7097059010192157 4.7432369048796188 2.5000000000000000 Mo2  
-3.2943426175657637 7.6079584664860729 2.5000000000000000 Mo3  
3.3357745977219397 1.8537017125611877 2.5000000000000000 Mo4  
-0.0211026121310489 7.6679835949528643 2.5000000000000000 Mo5  
6.5886852354503995 1.9019896751105383 2.5000000000000000 Mo6  
5.0040485189033790 4.7432369048821865 2.5000000000000000 Mo7  
3.3154452301242472 7.6679835949541406 2.5000000000000000 Mo8  
1.6471711853339861 0.9680026779621058 4.1740907756626200 Se1  
0.0225158242193357 3.8169787589356314 4.0787936455478766 Se2  
-1.6324421560545890 6.6484596145805037 4.1740907756626200 Se3  
4.9687556677973124 0.9667228727402746 4.2266693008981795 Se4  
3.2718265465547072 3.8169787589367528 4.0787936455478766 Se5  
1.6471711854393352 6.6309643892532382 4.0787936455478766 Se6  
8.2086145559929236 0.9667228727414530 4.2266693008981795 Se7  
6.5886851119473668 3.7725229745805628 4.2266693008981795 Se8  
4.9267845269341564 6.6484596145829515 4.1740907756626200 Se9  
1.6471711853339861 0.9680026779621058 0.8259093443373899 Se10  
0.0225158242193357 3.8169787589356314 0.9212064744521340 Se11  
-1.6324421560545890 6.6484596145805037 0.8259093443373899 Se12  
4.9687556677973124 0.9667228727402746 0.7733308191018300 Se13  
3.2718265465547072 3.8169787589367528 0.9212064744521340 Se14  
1.6471711854393352 6.6309643892532382 0.9212064744521340 Se15  
8.2086145559929236 0.9667228727414530 0.7733308191018300 Se16  
6.5886851119473668 3.7725229745805628 0.7733308191018300 Se17  
4.9267845269341564 6.6484596145829515 0.8259093443373899 Se18

**MoSe3 Vacancy**

**Lattice Vectors**

9.8096604664089249 0.0000000000001946 0.0000000000000000  
-4.9048302330492879 8.4954151663676800 0.0000000000000000  
0.0000000000000000 0.0000000000000000 20.0000000000000000

**Cartesian Coordinate**

-0.0216558171914039 1.8307075014549963 2.4338276537071120 Mo1  
-1.6952755945283831 4.7295019884320135 2.4338276537071120 Mo2  
-3.2698868219983641 7.5514802252850544 2.5608793025114100 Mo3  
3.2915426393945433 1.8307075014550620 2.4338276537071120 Mo4  
-0.0386763661829645 7.5988160196005374 2.4338276537071120 Mo5  
6.5397736443070773 1.8878701143734182 2.4693131225379261 Mo6  
4.9651624168374546 4.7295019884322063 2.4338276537071120 Mo7  
3.3085631885969260 7.5988160196006644 2.4338276537071120 Mo8  
1.6349432884678838 1.1185844638987690 4.2050694720073523 Se1  
-1.4836926566472890 6.5202203712927949 4.2050694720073523 Se2  
4.9117442589607778 0.9479268803037438 4.1627703506284783 Se3  
8.1678027843775407 0.9479268803038085 4.1627703506284783 Se4  
6.5397735217206652 3.7677562795095660 4.1627703506284783 Se5  
4.7535792337803855 6.5202203712929183 4.2050694720073523 Se6  
1.6349432884634973 0.8803378684196494 0.8071251708595640 Se7



|                     |                    |                    |      |
|---------------------|--------------------|--------------------|------|
| 0.1475898184436888  | 3.8609511425050100 | 1.1448897898961261 | Se8  |
| -1.6900202606962642 | 6.6393436690323817 | 0.8071251708595640 | Se9  |
| 4.8948258231169657  | 0.9381590168151621 | 0.7357945702243280 | Se10 |
| 3.1222967585920873  | 3.8609511425050087 | 1.1448897898961261 | Se11 |
| 1.6349432885649264  | 6.4371229214745842 | 1.1448897898961261 | Se12 |
| 8.1847212202210660  | 0.9381590168152274 | 0.7357945702243280 | Se13 |
| 6.5397735217209876  | 3.7872920064866684 | 0.7357945702243280 | Se14 |
| 4.9599068378337119  | 6.6393436690325132 | 0.8071251708595640 | Se15 |

### MoSe6 Vacancy

#### Lattice Vectors

|                     |                      |                      |
|---------------------|----------------------|----------------------|
| 9.2349513896829247  | -0.00000000000088104 | 0.00000000000000000  |
| -4.6174756947031685 | 7.9977025061486797   | 0.00000000000000000  |
| 0.00000000000000000 | 0.00000000000000000  | 20.00000000000000000 |

#### Cartesian Coordinate

|                     |                    |                     |      |
|---------------------|--------------------|---------------------|------|
| -0.1943322796041949 | 1.9368106007535537 | 2.50000000000000000 | Mo1  |
| -1.4981561501673171 | 4.1950997887487196 | 2.50000000000000000 | Mo2  |
| -3.0783171297713698 | 7.1090689672213401 | 2.50000000000000000 | Mo3  |
| 3.2726494095656378  | 1.9368106007502461 | 2.50000000000000000 | Mo4  |
| 0.2353346944695511  | 7.1975940060102230 | 2.50000000000000000 | Mo5  |
| 6.1566342598193273  | 1.7772672964496989 | 2.50000000000000000 | Mo6  |
| 4.5764732802065637  | 4.1950997887428674 | 2.50000000000000000 | Mo7  |
| 2.8429824356736315  | 7.1975940060076216 | 2.50000000000000000 | Mo8  |
| 1.5391584495313650  | 1.2137440794782532 | 4.1825963637140262  | Se1  |
| -1.2576047369863050 | 6.0578800153911994 | 4.1825963637140262  | Se2  |
| 4.6185044589125779  | 0.8892276134255659 | 4.3197248246787021  | Se3  |
| 7.6947638298216257  | 0.8892276134226877 | 4.3197248246787021  | Se4  |
| 6.1566341444132178  | 3.5533463772494023 | 4.3197248246787021  | Se5  |
| 4.3359216362162671  | 6.0578800153856927 | 4.1825963637140262  | Se6  |
| 1.5391584495313650  | 1.2137440794782532 | 0.8174037562859839  | Se7  |
| -1.2576047369863050 | 6.0578800153911994 | 0.8174037562859839  | Se8  |
| 4.6185044589125779  | 0.8892276134255659 | 0.6802752953213080  | Se9  |
| 7.6947638298216257  | 0.8892276134226877 | 0.6802752953213080  | Se10 |
| 6.1566341444132178  | 3.5533463772494023 | 0.6802752953213080  | Se11 |
| 4.3359216362162671  | 6.0578800153856927 | 0.8174037562859839  | Se12 |

## WS<sub>2</sub>

### S Vacancy

#### Lattice Vectors

|                     |                     |                     |
|---------------------|---------------------|---------------------|
| 9.4267623983714870  | -0.0000000000038032 | 0.0000000000000000  |
| -4.7133811990400813 | 8.1638157123928057  | 0.0000000000000000  |
| 0.0000000000000000  | 0.0000000000000000  | 20.0000000000000000 |

#### Cartesian Coordinate

|                     |                    |                    |     |
|---------------------|--------------------|--------------------|-----|
| 0.0197631224100241  | 1.8255915878262192 | 2.5012425979849700 | W1  |
| -1.5711270663143118 | 4.5367677192726266 | 2.5335921733389459 | W2  |
| -3.1411157670879923 | 7.2560679163934632 | 2.5335921733389459 | W3  |
| 3.1422541328241187  | 1.8831633495419393 | 2.4601134640724358 | W4  |
| 1.6308672358520582  | 4.5009622450605082 | 2.4601134640724358 | W5  |
| -0.0011383654435280 | 7.2560679163921966 | 2.5335921733389459 | W6  |
| 6.2647451432360919  | 1.8255915878236997 | 2.5012425979849700 | W7  |
| 4.6536410298895268  | 4.5009622450592888 | 2.4601134640724358 | W8  |
| 3.1422541329195548  | 7.2339046640117601 | 2.5012425979849700 | W9  |
| 1.6063946019088733  | 0.9733026620689033 | 4.0833252183234938 | S1  |
| 0.0749750262643092  | 3.6257991748608660 | 4.0833252183234938 | S2  |
| -1.5711271841164565 | 6.3496344202940467 | 4.1259118692995864 | S3  |
| 4.6781134280378494  | 0.9733026620676640 | 4.0833252183234938 | S4  |
| 1.6108344393762608  | 6.2859857115582365 | 4.0833252183234938 | S5  |
| 7.8556352141578891  | 0.9070906120296600 | 4.0773569050473659 | S6  |
| 6.2095330037770680  | 3.6257991748583911 | 4.0833252183234938 | S7  |
| 4.6736735907600426  | 6.2859857115570001 | 4.0833252183234938 | S8  |
| 1.5924461953629012  | 0.8994345687691012 | 0.9205387886510159 | S9  |
| 0.0040291776653354  | 3.6506535471009314 | 0.9205387886510159 | S10 |
| -1.5711271841164565 | 6.3496344202940467 | 0.9607235885545160 | S11 |
| 4.6920618345811178  | 0.8994345687678507 | 0.9205387886510159 | S12 |
| 3.1422540150206664  | 3.6283625161618822 | 0.8322039509603479 | S13 |
| 1.5538369973223389  | 6.3349994326180887 | 0.9205387886510159 | S14 |
| 7.8556352141578891  | 0.9070906120296600 | 0.9291444608143700 | S15 |
| 6.2804788523768611  | 3.6506535470983987 | 0.9205387886510159 | S16 |
| 4.7306710328156480  | 6.3349994326168071 | 0.9205387886510159 | S17 |

### 2S Vacancy

#### Lattice Vectors

|                     |                     |                     |
|---------------------|---------------------|---------------------|
| 9.3228680414213638  | -0.0000000000056772 | 0.0000000000000000  |
| -4.6614340205682865 | 8.0738405599664240  | 0.0000000000000000  |
| 0.0000000000000000  | 0.0000000000000000  | 20.0000000000000000 |

#### Cartesian Coordinate

|                     |                    |                    |    |
|---------------------|--------------------|--------------------|----|
| 0.0181522827068092  | 1.8046670899534245 | 2.4627066587017059 | W1 |
| -1.5538113401564624 | 4.5611108568260459 | 2.5825136082796978 | W2 |
| -3.0421132231405501 | 7.1389253352226305 | 2.5825136082796978 | W3 |
| 3.1076226805063119  | 1.8409320100824900 | 2.4583567874697101 | W4 |
| 1.5942938237528685  | 4.4620944786084307 | 2.4583567874697101 | W5 |
| -0.0655094570813803 | 7.1389253352208177 | 2.5825136082796978 | W6 |
| 6.1970930783044009  | 1.8046670899496617 | 2.4627066587017059 | W7 |
| 4.6209515373521119  | 4.4620944786065291 | 2.4583567874697101 | W8 |
| 3.1076226805999809  | 7.1557867873943071 | 2.4627066587017059 | W9 |
| 1.5700227257792250  | 0.9492554519239217 | 4.0897230104506841 | S1 |

|                     |                    |                    |     |
|---------------------|--------------------|--------------------|-----|
| 0.0532793199137700  | 3.5763320929969611 | 4.0897230104506841 | S2  |
| -1.5538114566619639 | 6.2796537464341542 | 4.2316474243429516 | S3  |
| 4.6452224021301909  | 0.9492554519220491 | 4.0897230104506841 | S4  |
| 1.5908791581362558  | 6.2395331344132536 | 4.0897230104506841 | S5  |
| 7.7690565846644377  | 0.8970933731194385 | 4.0360776126404119 | S6  |
| 6.1619658080882784  | 3.5763320929931837 | 4.0897230104506841 | S7  |
| 4.6243659699597650  | 6.2395331344114071 | 4.0897230104506841 | S8  |
| 1.6162687828400086  | 0.8179632031517853 | 0.9142495896139741 | S9  |
| -0.0373000743099743 | 3.6820284776243923 | 0.9142495896139741 | S10 |
| 4.5989763450647114  | 0.8179632031499688 | 0.9142495896139741 | S11 |
| 3.1076225640011867  | 3.5883735597768247 | 0.8288962856946119 | S12 |
| 1.4540537068479340  | 6.2651289985580689 | 0.9142495896139741 | S13 |
| 7.7690565846644377  | 0.8970933731194385 | 0.8688128735799699 | S14 |
| 6.2525452023157175  | 3.6820284776205621 | 0.9142495896139741 | S15 |
| 4.7611914212489239  | 6.2651289985560554 | 0.9142495896139741 | S16 |

**2Ss Vacancy**

**Lattice Vectors**

|                     |                     |                    |
|---------------------|---------------------|--------------------|
| 9.3349520522472584  | -0.0000000000055554 | 0.0000000000000000 |
| -4.6674760259809371 | 8.0843056203210839  | 0.0000000000000000 |

**Cartesian Coordinate**

|                     |                    |                    |     |
|---------------------|--------------------|--------------------|-----|
| 0.0298589029742578  | 1.8137514793790162 | 2.5000000000000000 | W1  |
| -1.5558253419619017 | 4.4919731154151092 | 2.5000000000000000 | W2  |
| -3.1110512717640511 | 7.1857034431516462 | 2.5000000000000000 | W3  |
| 3.1116506841170839  | 1.9607723173589895 | 2.5000000000000000 | W4  |
| 1.6980785741685951  | 4.4091510320163305 | 2.5000000000000000 | W5  |
| -0.0005994120646955 | 7.1857034431497375 | 2.5000000000000000 | W6  |
| 6.1934424652546527  | 1.8137514793753482 | 2.5000000000000000 | W7  |
| 4.5252227941518353  | 4.4091510320145906 | 2.5000000000000000 | W8  |
| 3.1116506842086373  | 7.1515714226354872 | 2.5000000000000000 | W9  |
| 1.6119590077255677  | 0.9631481713533422 | 4.0853059448527063 | S1  |
| 0.0842649069863688  | 3.6091919723264105 | 4.0853059448527063 | S2  |
| -1.5558254586170990 | 6.2877932377920684 | 4.0862229676764619 | S3  |
| 4.6113421270994621  | 0.9631481713515572 | 4.0853059448527063 | S4  |
| 1.5839564667191639  | 6.2067339493734757 | 4.0853059448527063 | S5  |
| 7.7791265935349987  | 0.8982561575743282 | 4.0800290553069383 | S6  |
| 6.1390362279320687  | 3.6091919723228072 | 4.0853059448527063 | S7  |
| 4.6393446682909687  | 6.2067339493716567 | 4.0853059448527063 | S8  |
| 1.6119590077255677  | 0.9631481713533422 | 0.9146941751473039 | S9  |
| 0.0842649069863688  | 3.6091919723264105 | 0.9146941751473039 | S10 |
| -1.5558254586170990 | 6.2877932377920684 | 0.9137771523235481 | S11 |
| 4.6113421270994621  | 0.9631481713515572 | 0.9146941751473039 | S12 |
| 1.5839564667191639  | 6.2067339493734757 | 0.9146941751473039 | S13 |
| 7.7791265935349987  | 0.8982561575743282 | 0.9199710646930720 | S14 |
| 6.1390362279320687  | 3.6091919723228072 | 0.9146941751473039 | S15 |
| 4.6393446682909687  | 6.2067339493716567 | 0.9146941751473039 | S16 |

**W Vacancy**

**Lattice Vectors**

|                     |                     |                    |
|---------------------|---------------------|--------------------|
| 9.5741194205013915  | -0.0000000000012311 | 0.0000000000000000 |
| -4.7870597101004790 | 8.2914306369802002  | 0.0000000000000000 |

0.0000000000000000 0.0000000000000000 20.0000000000000000

**Cartesian Coordinate**

|                     |                    |                    |     |
|---------------------|--------------------|--------------------|-----|
| -0.0245987785143460 | 1.8836532286752714 | 2.5000000000000000 | W1  |
| -1.5723810468204893 | 4.5644907565069222 | 2.5000000000000000 | W2  |
| -3.1913731400335936 | 7.3701606417486119 | 2.5000000000000000 | W3  |
| 3.2159719187497524  | 1.8836532286748549 | 2.5000000000000000 | W4  |
| 0.0479043018624381  | 7.3709073030830838 | 2.5000000000000000 | W5  |
| 6.3827462803676198  | 1.8425402170943437 | 2.5000000000000000 | W6  |
| 4.7637541871529656  | 4.5644907565061077 | 2.5000000000000000 | W7  |
| 3.1434688385717946  | 7.3709073030826859 | 2.5000000000000000 | W8  |
| 1.5956864504242092  | 0.9448583579155611 | 4.0533365730905766 | S1  |
| -0.0416153650708155 | 3.6610536869013197 | 4.0738514558123020 | S2  |
| -1.5752586138019957 | 6.4370963173109850 | 4.0533365730905766 | S3  |
| 4.7932830106826856  | 0.9248631410083337 | 4.0638505415924442 | S4  |
| 3.2329882660175846  | 3.6610536869008987 | 4.0738514558123020 | S5  |
| 1.5956864505247625  | 6.4969436187345551 | 4.0738514558123020 | S6  |
| 7.9722093106663996  | 0.9248631410079249 | 4.0638505415924442 | S7  |
| 6.3827461607244196  | 3.6778940735390262 | 4.0638505415924442 | S8  |
| 4.7666315148494203  | 6.4370963173101696 | 4.0533365730905766 | S9  |
| 1.5956864504242092  | 0.9448583579155611 | 0.9466635469094340 | S10 |
| -0.0416153650708155 | 3.6610536869013197 | 0.9261486641877080 | S11 |
| -1.5752586138019957 | 6.4370963173109850 | 0.9466635469094340 | S12 |
| 4.7932830106826856  | 0.9248631410083337 | 0.9361495784075660 | S13 |
| 3.2329882660175846  | 3.6610536869008987 | 0.9261486641877080 | S14 |
| 1.5956864505247625  | 6.4969436187345551 | 0.9261486641877080 | S15 |
| 7.9722093106663996  | 0.9248631410079249 | 0.9361495784075660 | S16 |
| 6.3827461607244196  | 3.6778940735390262 | 0.9361495784075660 | S17 |
| 4.7666315148494203  | 6.4370963173101696 | 0.9466635469094340 | S18 |

**WS3 Vacancy**

**Lattice Vectors**

|                     |                     |                     |
|---------------------|---------------------|---------------------|
| 9.4640322670922874  | -0.0000000000033128 | 0.0000000000000000  |
| -4.7320161333994673 | 8.1960923655000961  | 0.0000000000000000  |
| 0.0000000000000000  | 0.0000000000000000  | 20.0000000000000000 |

**Cartesian Coordinate**

|                     |                    |                    |    |
|---------------------|--------------------|--------------------|----|
| -0.0334217312352341 | 1.7822074736662517 | 2.4193844349622400 | W1 |
| -1.6279514055704232 | 4.5440138838640394 | 2.4193844349622400 | W2 |
| -3.1546774222337062 | 7.2854155106752065 | 2.5298095793618818 | W3 |
| 3.1880991536631420  | 1.7822074736651239 | 2.4193844349622400 | W4 |
| -0.0171909630712728 | 7.3339328089942200 | 2.4193844349622400 | W5 |
| 6.3093548447607644  | 1.8213539336729527 | 2.4520963819261961 | W6 |
| 4.7826288280971125  | 4.5440138838617949 | 2.4193844349622400 | W7 |
| 3.1718683856978869  | 7.3339328089931035 | 2.4193844349622400 | W8 |
| 1.5773385929011088  | 1.0903827885742439 | 4.0741682177990421 | S1 |
| -1.4217089704847385 | 6.2848855428114456 | 4.0741682177990421 | S2 |
| 4.7475100126149012  | 0.9196223702736160 | 4.0438919358322778 | S3 |
| 7.8711994402735606  | 0.9196223702725226 | 4.0438919358322778 | S4 |
| 6.3093547264926428  | 3.6248167681454304 | 4.0438919358322778 | S5 |
| 4.5763861564728767  | 6.2848855428093460 | 4.0741682177990421 | S6 |
| 1.5773385928971397  | 0.8686069524311306 | 0.9053579560986701 | S7 |
| 0.1543637298525975  | 3.7318297044775988 | 1.2478399680163941 | S8 |

|                     |                    |                    |     |
|---------------------|--------------------|--------------------|-----|
| -1.6137724785291421 | 6.3957734608830696 | 0.9053579560986701 | S9  |
| 4.7161531360372217  | 0.9015184691408697 | 0.8293732012792541 | S10 |
| 3.0003134560442972  | 3.7318297044766027 | 1.2478399680163941 | S11 |
| 1.5773385929925552  | 6.1964944652407175 | 1.2478399680163941 | S12 |
| 7.9025563168505242  | 0.9015184691397544 | 0.8293732012792541 | S13 |
| 6.3093547264932575  | 3.6610245704110014 | 0.8293732012792541 | S14 |
| 4.7684496645212491  | 6.3957734608808350 | 0.9053579560986701 | S15 |

**WS6 Vacancy**

**Lattice Vectors**

|                     |                     |                     |  |
|---------------------|---------------------|---------------------|--|
| 9.0872946098196330  | -0.0000000000102040 | 0.0000000000000000  |  |
| -4.5436473047750621 | 7.8698279837480527  | 0.0000000000000000  |  |
| 0.0000000000000000  | 0.0000000000000000  | 20.0000000000000000 |  |

**Cartesian Coordinate**

|                     |                    |                    |     |
|---------------------|--------------------|--------------------|-----|
| -0.1307136089836106 | 1.8410603042513092 | 2.5000000000000000 | W1  |
| -1.5000500764176130 | 4.2128206385654430 | 2.5000000000000000 | W2  |
| -3.0290982031534193 | 6.9954027239222150 | 2.5000000000000000 | W3  |
| 3.1598118123199574  | 1.8410603042476141 | 2.5000000000000000 | W4  |
| 0.1452126342829985  | 7.0624992451985200 | 2.5000000000000000 | W5  |
| 6.0581964065763465  | 1.7488507347500633 | 2.5000000000000000 | W6  |
| 4.5291482798350202  | 4.2128206385586173 | 2.5000000000000000 | W7  |
| 2.8838855692320644  | 7.0624992451953892 | 2.5000000000000000 | W8  |
| 1.5145489880640977  | 1.0896222277860954 | 4.0596730581034981 | S1  |
| -1.3281832172146961 | 6.0133788397690768 | 4.0596730581034981 | S2  |
| 4.5331491203367387  | 0.8683642455453541 | 4.1639931221207860 | S3  |
| 7.5832434656034486  | 0.8683642455419291 | 4.1639931221207860 | S4  |
| 6.0581962930153237  | 3.5098234324723805 | 4.1639931221207860 | S5  |
| 4.3572811935115094  | 6.0133788397626926 | 4.0596730581034981 | S6  |
| 1.5145489880640977  | 1.0896222277860954 | 0.9403270618965099 | S7  |
| -1.3281832172146961 | 6.0133788397690768 | 0.9403270618965099 | S8  |
| 4.5331491203367387  | 0.8683642455453541 | 0.8360069978792239 | S9  |
| 7.5832434656034486  | 0.8683642455419291 | 0.8360069978792239 | S10 |
| 6.0581962930153237  | 3.5098234324723805 | 0.8360069978792239 | S11 |
| 4.3572811935115094  | 6.0133788397626926 | 0.9403270618965099 | S12 |

## WSe<sub>2</sub>

### Se Vacancy

#### Lattice Vectors

|                     |                    |                     |
|---------------------|--------------------|---------------------|
| 9.7644500272290689  | 0.0000000000014230 | 0.0000000000000000  |
| -4.8822250134590117 | 8.4562617775206785 | 0.0000000000000000  |
| 0.0000000000000000  | 0.0000000000000000 | 20.0000000000000000 |

#### Cartesian Coordinate

|                     |                    |                    |      |
|---------------------|--------------------|--------------------|------|
| 0.0197695848084287  | 1.8905833360303670 | 2.5084124025336503 | W1   |
| -1.6274083377850683 | 4.7007991467958901 | 2.5431993187757480 | W2   |
| -3.2523261077731456 | 7.5152392826119838 | 2.5431993187757480 | W3   |
| 3.2548166757798787  | 1.9951839232852400 | 2.4574617039696980 | W4   |
| 1.7278798961572610  | 4.6399160056077866 | 2.4574617039696980 | W5   |
| -0.0024905676933988 | 7.5152392826124581 | 2.5431993187757480 | W6   |
| 6.4898637667471686  | 1.8905833360312501 | 2.5084124025336503 | W7   |
| 4.7817534554993264  | 4.6399160056080513 | 2.4574617039696980 | W8   |
| 3.2548166758807993  | 7.4938492624394613 | 2.5084124025336503 | W9   |
| 1.6735213026544833  | 1.0177417721363460 | 4.2015469598243280 | Se1  |
| 0.0907425019971346  | 3.7591950720909608 | 4.2015469598243280 | Se2  |
| -1.6274084598061447 | 6.5770924701378695 | 4.2530028962029585 | Se3  |
| 4.8361118047578078  | 1.0177417721368069 | 4.2015469598243280 | Se4  |
| 1.6720377530992381  | 6.4980787886662439 | 4.2015469598243280 | Se5  |
| 8.1370415673192067  | 0.9395846184583855 | 4.2008382003609759 | Se6  |
| 6.4188906055158901  | 3.7591950720918232 | 4.2015469598243280 | Se7  |
| 4.8375953545144963  | 6.4980787886667049 | 4.2015469598243280 | Se8  |
| 1.6521982338852799  | 0.9342205542943751 | 0.8182197222986081 | Se9  |
| 0.0077494712073110  | 3.7824893617726425 | 0.8182197222986081 | Se10 |
| -1.6274084598061447 | 6.5770924701378695 | 0.8526944004242399 | Se11 |
| 4.8574348735238360  | 0.9342205542947821 | 0.8182197222986081 | Se12 |
| 3.2548165537564797  | 3.7583385442981574 | 0.6618924970618421 | Se13 |
| 1.6103677910775533  | 6.5583057168265082 | 0.8182197222986081 | Se14 |
| 8.1370415673192067  | 0.9395846184583855 | 0.8191211600880879 | Se15 |
| 6.5018836363066761  | 3.7824893617735889 | 0.8182197222986081 | Se16 |
| 4.8992653165384663  | 6.5583057168269869 | 0.8182197222986081 | Se17 |

### 2Se Vacancy

#### Lattice Vectors

|                     |                     |                     |
|---------------------|---------------------|---------------------|
| 9.6320258038606479  | -0.0000000000011976 | 0.0000000000000000  |
| -4.8160129017791622 | 8.3415790360103177  | 0.0000000000000000  |
| 0.0000000000000000  | 0.0000000000000000  | 20.0000000000000000 |

#### Cartesian Coordinate

|                     |                    |                    |     |
|---------------------|--------------------|--------------------|-----|
| 0.0127663720094489  | 1.8610549745221567 | 2.4553386409415618 | W1  |
| -1.6053376338903851 | 4.7622184850303313 | 2.5948820408454760 | W2  |
| -3.0998172321530206 | 7.3507330801649839 | 2.5948820408454760 | W3  |
| 3.2106752679889698  | 1.9495820316982617 | 2.4526163010423820 | W4  |
| 1.6883875004852280  | 4.5862617888252641 | 2.4526163010423820 | W5  |
| -0.1108580355341733 | 7.3507330801644342 | 2.5948820408454760 | W6  |
| 6.4085841639651111  | 1.8610549745213023 | 2.4553386409415618 | W7  |
| 4.7329630355879990  | 4.5862617888247676 | 2.4526163010423820 | W8  |
| 3.2106752680876367  | 7.3999956603047155 | 2.4553386409415618 | W9  |
| 1.6285134011499873  | 0.9875906244343630 | 4.1982436561441725 | Se1 |

|                     |                    |                    |      |
|---------------------|--------------------|--------------------|------|
| 0.0641975958266854  | 3.6970650784093220 | 4.1982436561441725 | Se2  |
| -1.6053377542594975 | 6.4878947826144584 | 4.4197120506095180 | Se3  |
| 4.7928368939922512  | 0.9875906244339695 | 4.1982436561441725 | Se4  |
| 1.6463593422974774  | 6.4374496089890174 | 4.1982436561441725 | Se5  |
| 8.0266880495003416  | 0.9268420919401348 | 4.1518230720186020 | Se6  |
| 6.3571526994137528  | 3.6970650784085399 | 4.1982436561441725 | Se7  |
| 4.7749909530422805  | 6.4374496089886284 | 4.1982436561441725 | Se8  |
| 1.6773864103883191  | 0.8327656389639867 | 0.8077546177648280 | Se9  |
| -0.0454482701091297 | 3.8168028387065305 | 0.8077546177648280 | Se10 |
| 4.7439638847482737  | 0.8327656389635462 | 0.8077546177648280 | Se11 |
| 3.2106751476203712  | 3.7073684372773266 | 0.6511796907028621 | Se12 |
| 1.4878404671189225  | 6.4725368341622129 | 0.8077546177648280 | Se13 |
| 8.0266880495003416  | 0.9268420919401348 | 0.7327855547278260 | Se14 |
| 6.4667985653539750  | 3.8168028387057205 | 0.8077546177648280 | Se15 |
| 4.9335098282220384  | 6.4725368341619030 | 0.8077546177648280 | Se16 |

**2Ses Vacancy**

**Lattice Vectors**

|                     |                     |                     |
|---------------------|---------------------|---------------------|
| 9.6609213627883292  | -0.0000000000006091 | 0.0000000000000000  |
| -4.8304606812420356 | 8.3666033240975413  | 0.0000000000000000  |
| 0.0000000000000000  | 0.0000000000000000  | 20.0000000000000000 |

**Cartesian Coordinate**

|                     |                    |                    |      |
|---------------------|--------------------|--------------------|------|
| 0.0212482851298614  | 1.8715129624816058 | 2.5000000000000000 | W1   |
| -1.6101535603801898 | 4.6496196210343133 | 2.5000000000000000 | W2   |
| -3.2190023782022892 | 7.4362275152734423 | 2.5000000000000000 | W3   |
| 3.2203071209679752  | 2.1065547160923255 | 2.5000000000000000 | W4   |
| 1.8243298326729871  | 4.5244583056955543 | 2.5000000000000000 | W5   |
| -0.0013047424566839 | 7.4362275152732389 | 2.5000000000000000 | W6   |
| 6.4193659567970958  | 1.8715129624811431 | 2.5000000000000000 | W7   |
| 4.6162844093502065  | 4.5244583056950223 | 2.5000000000000000 | W8   |
| 3.2203071210641774  | 7.4124454025200937 | 2.5000000000000000 | W9   |
| 1.6756670123529158  | 1.0079019427386484 | 4.1931929938674282 | Se1  |
| 0.1005485924564207  | 3.7360870740095602 | 4.1931929938674282 | Se2  |
| -1.6101536811078865 | 6.5073581177240296 | 4.2055446932459981 | Se3  |
| 4.7649469880196147  | 1.0079019427383942 | 4.1931929938674282 | Se4  |
| 1.6451885803383655  | 6.4114820123262399 | 4.1931929938674282 | Se5  |
| 8.0507676815789893  | 0.9296225683252819 | 4.2071778423547821 | Se6  |
| 6.3400654080153220  | 3.7360870740091077 | 4.1931929938674282 | Se7  |
| 4.7954254202305329  | 6.4114820123259824 | 4.1931929938674282 | Se8  |
| 1.6756670123529158  | 1.0079019427386484 | 0.8068071261325820 | Se9  |
| 0.1005485924564207  | 3.7360870740095602 | 0.8068071261325820 | Se10 |
| -1.6101536811078865 | 6.5073581177240296 | 0.7944554267540120 | Se11 |
| 4.7649469880196147  | 1.0079019427383942 | 0.8068071261325820 | Se12 |
| 1.6451885803383655  | 6.4114820123262399 | 0.8068071261325820 | Se13 |
| 8.0507676815789893  | 0.9296225683252819 | 0.7928222776452281 | Se14 |
| 6.3400654080153220  | 3.7360870740091077 | 0.8068071261325820 | Se15 |
| 4.7954254202305329  | 6.4114820123259824 | 0.8068071261325820 | Se16 |

**W Vacancy**

**Lattice Vectors**

|                    |                    |                    |
|--------------------|--------------------|--------------------|
| 9.8949506060137598 | 0.0000000000039254 | 0.0000000000000000 |
|--------------------|--------------------|--------------------|

|                     |                    |                     |  |
|---------------------|--------------------|---------------------|--|
| -4.9474753028471294 | 8.5692785939538059 | 0.0000000000000000  |  |
| 0.0000000000000000  | 0.0000000000000000 | 20.0000000000000000 |  |

**Cartesian Coordinate**

|                     |                    |                    |      |
|---------------------|--------------------|--------------------|------|
| -0.0760635115966075 | 1.8433042861417590 | 2.5000000000000000 | W1   |
| -1.7400003533023596 | 4.7253274366392883 | 2.5000000000000000 | W2   |
| -3.2983168685292421 | 7.6171366060350039 | 2.5000000000000000 | W3   |
| 3.3743803803366106  | 1.8433042861431279 | 2.5000000000000000 | W4   |
| -0.0147784072800086 | 7.7134995013714542 | 2.5000000000000000 | W5   |
| 6.5966337373779833  | 1.9042842100684370 | 2.5000000000000000 | W6   |
| 5.0383172221497468  | 4.7253274366419777 | 2.5000000000000000 | W7   |
| 3.3130952762388794  | 7.7134995013727741 | 2.5000000000000000 | W8   |
| 1.6491583106670484  | 0.9808619004298483 | 4.1660789600146577 | Se1  |
| 0.0011595628923584  | 3.8092377854945001 | 4.0886202000714880 | Se2  |
| -1.6242864310714609 | 6.6506345090425434 | 4.1660789600146577 | Se3  |
| 4.9819748510901913  | 0.9720604369664305 | 4.2586114993198985 | Se4  |
| 3.2971570585471923  | 3.8092377854956845 | 4.0886202000714880 | Se5  |
| 1.6491583107729180  | 6.6636553475273477 | 4.0886202000714880 | Se6  |
| 8.2112923762572674  | 0.9720604369677116 | 4.2586114993198985 | Se7  |
| 6.5966336137258654  | 3.7687314506335712 | 4.2586114993198985 | Se8  |
| 4.9226030526169531  | 6.6506345090451404 | 4.1660789600146577 | Se9  |
| 1.6491583106670484  | 0.9808619004298483 | 0.8339211599853520 | Se10 |
| 0.0011595628923584  | 3.8092377854945001 | 0.9113799199285221 | Se11 |
| -1.6242864310714609 | 6.6506345090425434 | 0.8339211599853520 | Se12 |
| 4.9819748510901913  | 0.9720604369664305 | 0.7413886206801119 | Se13 |
| 3.2971570585471923  | 3.8092377854956845 | 0.9113799199285221 | Se14 |
| 1.6491583107729180  | 6.6636553475273477 | 0.9113799199285221 | Se15 |
| 8.2112923762572674  | 0.9720604369677116 | 0.7413886206801119 | Se16 |
| 6.5966336137258654  | 3.7687314506335712 | 0.7413886206801119 | Se17 |
| 4.9226030526169531  | 6.6506345090451404 | 0.8339211599853520 | Se18 |

**WSe3 Vacancy**

**Lattice Vectors**

|                     |                    |                     |  |
|---------------------|--------------------|---------------------|--|
| 9.7868425635624341  | 0.000000000018304  | 0.0000000000000000  |  |
| -4.8934212816249856 | 8.4756542828400452 | 0.0000000000000000  |  |
| 0.0000000000000000  | 0.0000000000000000 | 20.0000000000000000 |  |

**Cartesian Coordinate**

|                     |                    |                    |     |
|---------------------|--------------------|--------------------|-----|
| -0.0690889489105019 | 1.8335728064940131 | 2.4383569283661402 | W1  |
| -1.7089047656633456 | 4.6738171162409818 | 2.4383569283661402 | W2  |
| -3.2622808543819284 | 7.5339149953028510 | 2.5560615151841541 | W3  |
| 3.3313698034990367  | 1.8335728064947094 | 2.4383569283661402 | W4  |
| -0.0086753894042415 | 7.6187007803341542 | 2.4383569283661402 | W5  |
| 6.5245617090763179  | 1.8834788067440613 | 2.4689699410313883 | W6  |
| 4.9711856203563460  | 4.6738171162422315 | 2.4383569283661402 | W7  |
| 3.2709562442059461  | 7.6187007803346480 | 2.4383569283661402 | W8  |
| 1.6311403049462321  | 1.1520211343015765 | 4.1983538624505519 | Se1 |
| -1.4490311747107731 | 6.4870346332347300 | 4.1983538624505519 | Se2 |
| 4.9178789028413368  | 0.9558600259405590 | 4.2046084715164120 | Se3 |
| 8.1312442706060502  | 0.9558600259411599 | 4.2046084715164120 | Se4 |
| 6.5245615867749889  | 3.7387160660521346 | 4.2046084715164120 | Se5 |
| 4.7113117847996042  | 6.4870346332357007 | 4.1983538624505519 | Se6 |
| 1.6311403049414255  | 0.8969501004814524 | 0.8168156173331560 | Se7 |



|                     |                    |                    |      |
|---------------------|--------------------|--------------------|------|
| 0.1434805599529327  | 3.8497960459983869 | 1.1222565598167160 | Se8  |
| -1.6699291697673115 | 6.6145701501446608 | 0.8168156173331560 | Se9  |
| 4.8927913115996393  | 0.9413756983840681 | 0.7062766161252200 | Se10 |
| 3.1188000500387791  | 3.8497960459988221 | 1.1222565598167160 | Se11 |
| 1.6311403050432118  | 6.4264983087749199 | 1.1222565598167160 | Se12 |
| 8.1563318618471801  | 0.9413756983847387 | 0.7062766161252200 | Se13 |
| 6.5245615867755227  | 3.7676847211651072 | 0.7062766161252200 | Se14 |
| 4.9322097798609494  | 6.6145701501458953 | 0.8168156173331560 | Se15 |

**WSe6 Vacancy**

**Lattice Vectors**

|                     |                     |                     |
|---------------------|---------------------|---------------------|
| 9.3528778482941828  | -0.0000000000072522 | 0.0000000000000000  |
| -4.6764389240055833 | 8.0998298150823445  | 0.0000000000000000  |
| 0.0000000000000000  | 0.0000000000000000  | 20.0000000000000000 |

**Cartesian Coordinate**

|                     |                    |                    |      |
|---------------------|--------------------|--------------------|------|
| -0.2233890609370346 | 1.8991424588592776 | 2.5000000000000000 | W1   |
| -1.5846149289684446 | 4.2568548229283047 | 2.5000000000000000 | W2   |
| -3.1176259493055989 | 7.1998487983152639 | 2.5000000000000000 | W3   |
| 3.3410150104350080  | 1.8991424588566288 | 2.5000000000000000 | W4   |
| 0.1975871067716053  | 7.3437192980737178 | 2.5000000000000000 | W5   |
| 6.2352518988942123  | 1.7999622549222185 | 2.5000000000000000 | W6   |
| 4.7022408785483343  | 4.2568548229233141 | 2.5000000000000000 | W7   |
| 2.9200388429163739  | 7.3437192980713188 | 2.5000000000000000 | W8   |
| 1.5588128578255065  | 1.1828688725089296 | 4.1504904544824219 | Se1  |
| -1.3138250664474613 | 6.1584237092289840 | 4.1504904544824219 | Se2  |
| 4.6794481202575344  | 0.9017184957350439 | 4.3441245811393960 | Se3  |
| 7.7910554436775392  | 0.9017184957326886 | 4.3441245811393960 | Se4  |
| 6.2352517820146645  | 3.5964494844049977 | 4.3441245811393960 | Se5  |
| 4.4314507822719609  | 6.1584237092243557 | 4.1504904544824219 | Se6  |
| 1.5588128578255065  | 1.1828688725089296 | 0.8495096655175880 | Se7  |
| -1.3138250664474613 | 6.1584237092289840 | 0.8495096655175880 | Se8  |
| 4.6794481202575344  | 0.9017184957350439 | 0.6558755388606140 | Se9  |
| 7.7910554436775392  | 0.9017184957326886 | 0.6558755388606140 | Se10 |
| 6.2352517820146645  | 3.5964494844049977 | 0.6558755388606140 | Se11 |
| 4.4314507822719609  | 6.1584237092243557 | 0.8495096655175880 | Se12 |
